# Supplementary material for: Colour tuning by the stepwise synthesis of mononuclear and homo- and hetero-dinuclear platinum(ii) complexes using a zwitterionic quinonoid ligand
Source: Royal Society of Chemistry journal article supplement (doi:10.1039/c6dt02328b), 2016-01-01
Supplement: c6dt02328b1.pdf [file c6dt02328b1.pdf]

## **Supporting information**

**Colour tuning by the stepwise synthesis of mononuclear and homo- and hetero-dinuclear platinum(II) complexes using a zwitterionic quinonoid ligand**

**Paramita Kar, Masaki Yoshida, Atsushi Kobayashi, Lucie Routaboul, Pierre Braunstein, Masako Kato**

---

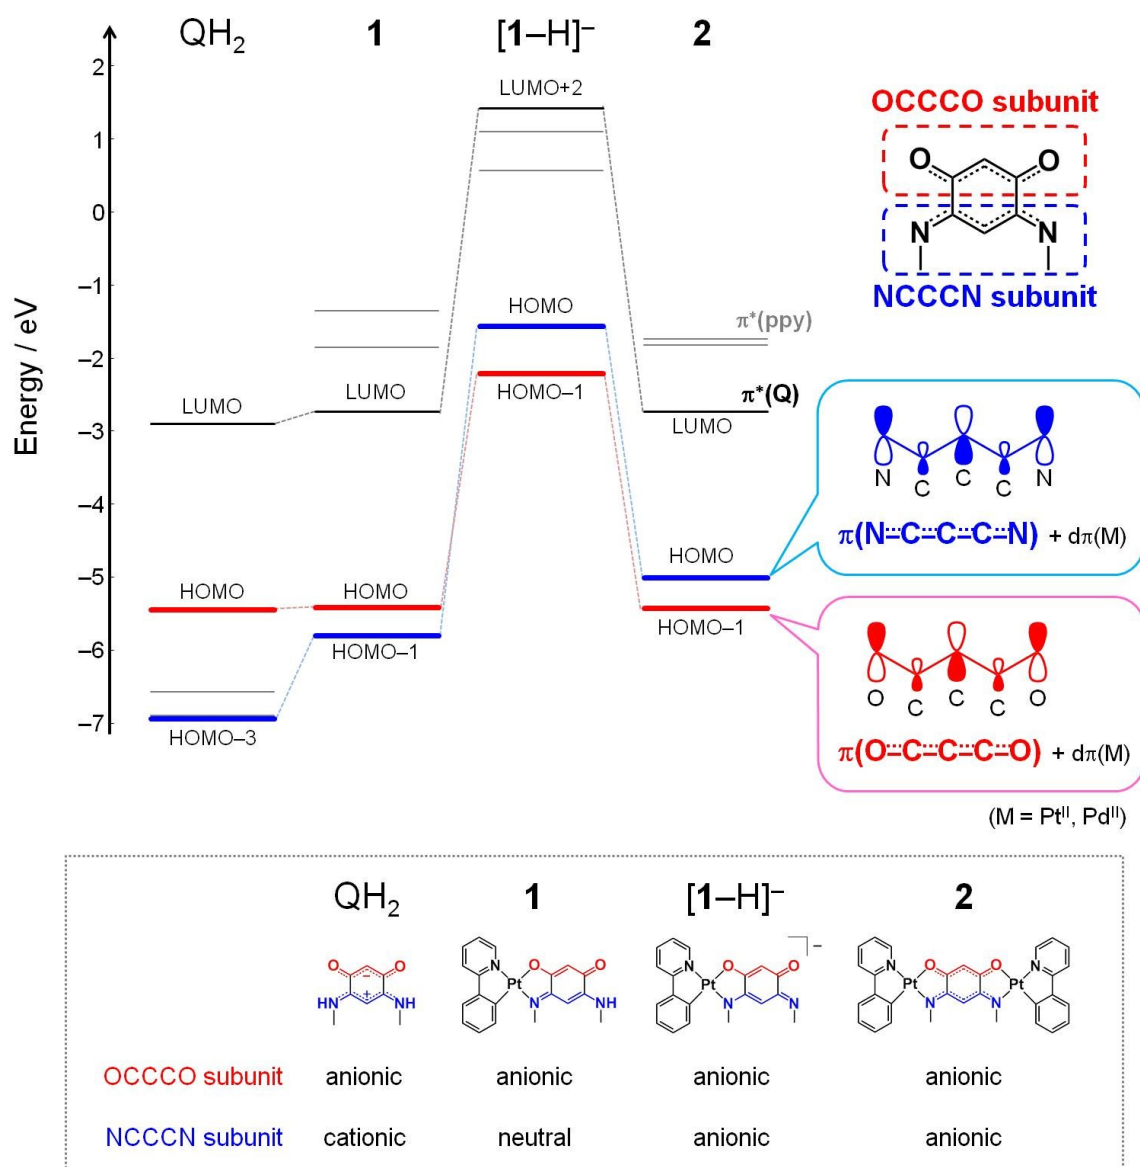

**Scheme S1.** Molecular orbital diagrams of QH<sub>2</sub>, **1**, [1-H]<sup>-</sup> (= deprotonated form of **1**), and **2** calculated by the DFT method. Orbitals represented as blue and red lines are π orbitals involving NCCCN and OCCCO subunits, respectively (the detailed results of the DFT calculations for QH<sub>2</sub> and [1-H]<sup>-</sup> are shown in Fig. S8 and Scheme S2).

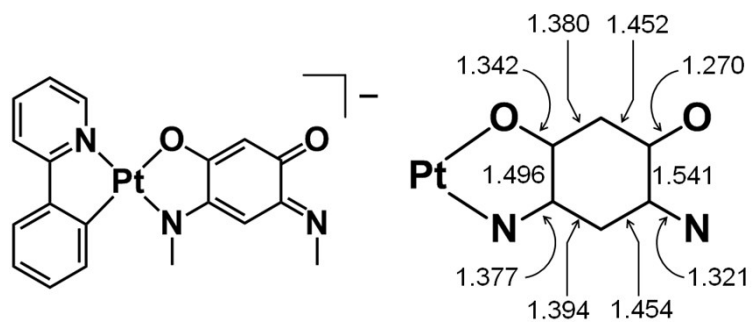

**Scheme S2.** Calculated bond distances in quinonoid ligand Q<sup>2-</sup> in the optimized structure of [1-H]<sup>-</sup>. In contrast to the *p*-quinone like structure of **1**, ligand Q<sup>2-</sup> of [1-H]<sup>-</sup> adopted *o*-quinone form in this optimized structure, presumably due to the polarization by the positively charged Pt(II) center.

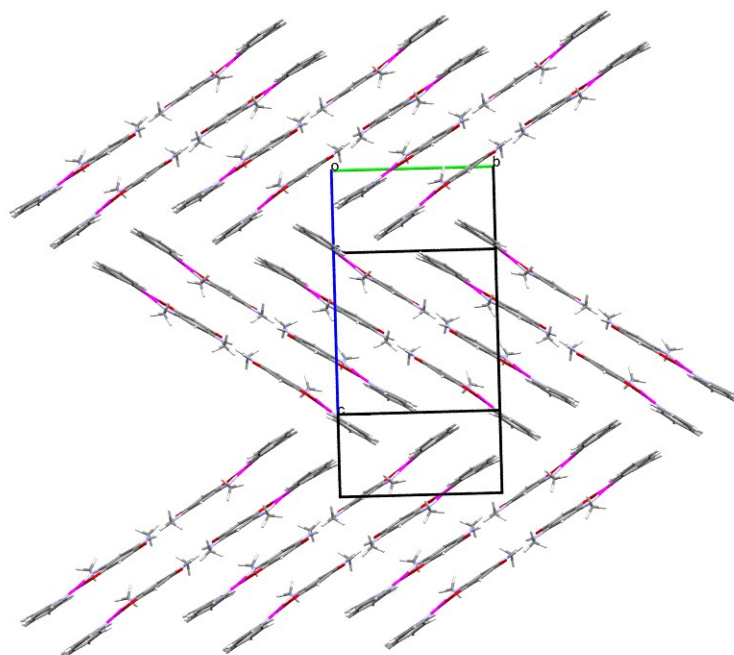

**Fig. S1.** Packing structure of complex **1**.

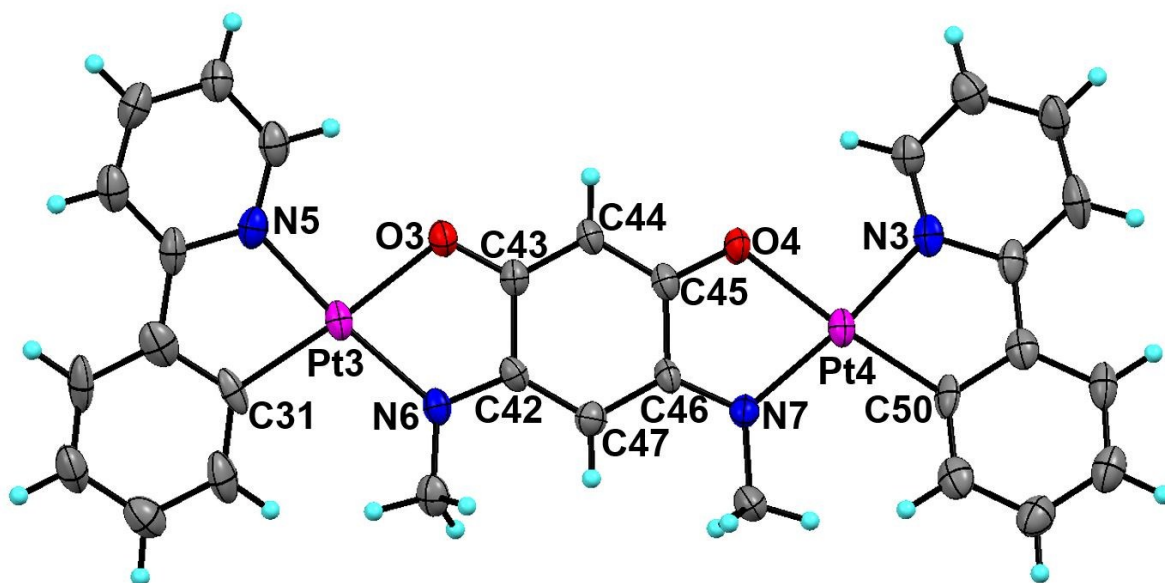

**Fig. S2.** Coordination environment around the metal centers in one crystallographically independent dinuclear unit complex **2**. Coordination environment of another unit is shown in main manuscript.

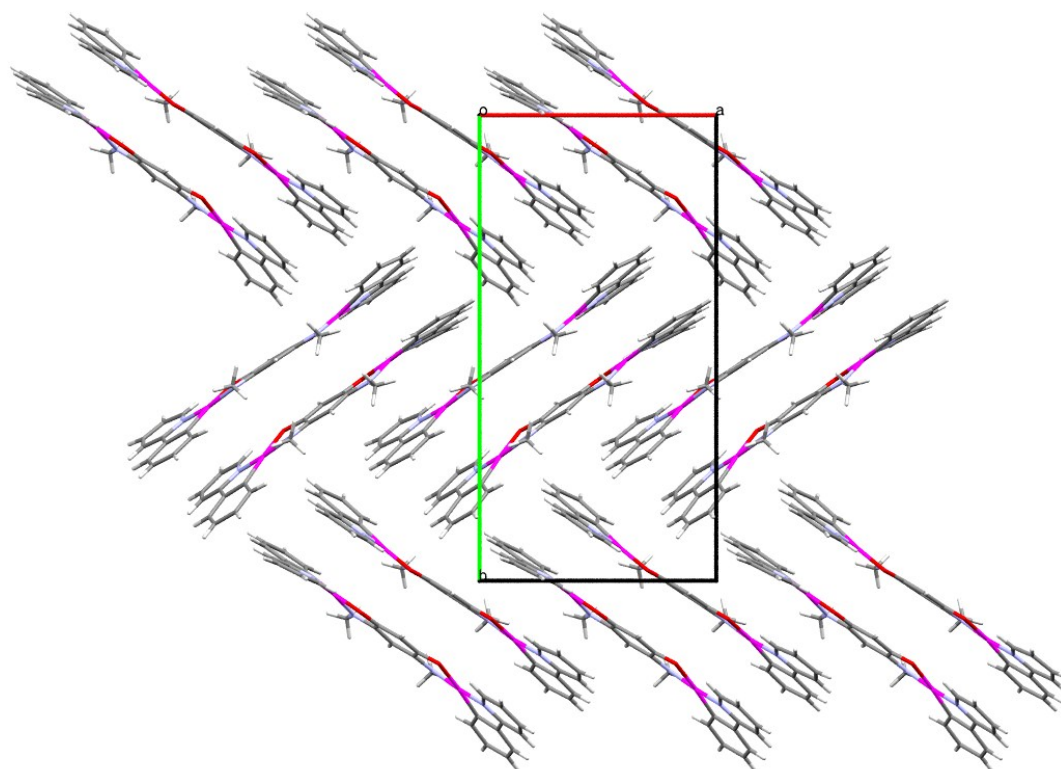

**Fig. S3.** Packing structure of complex **2**.

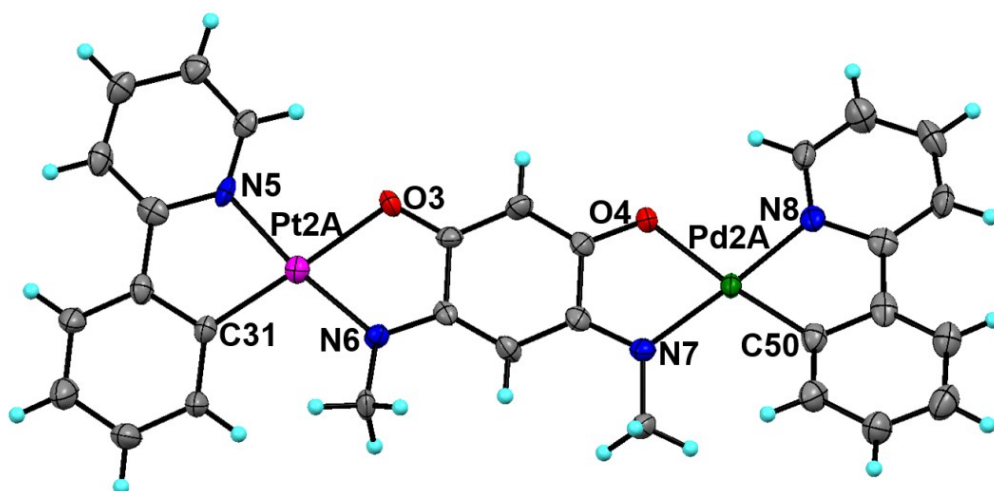

**Fig. S4.** Coordination environment around the metal centers in one crystallographically independent dinuclear unit complex **3**. Coordination environment of another unit is shown in main manuscript.

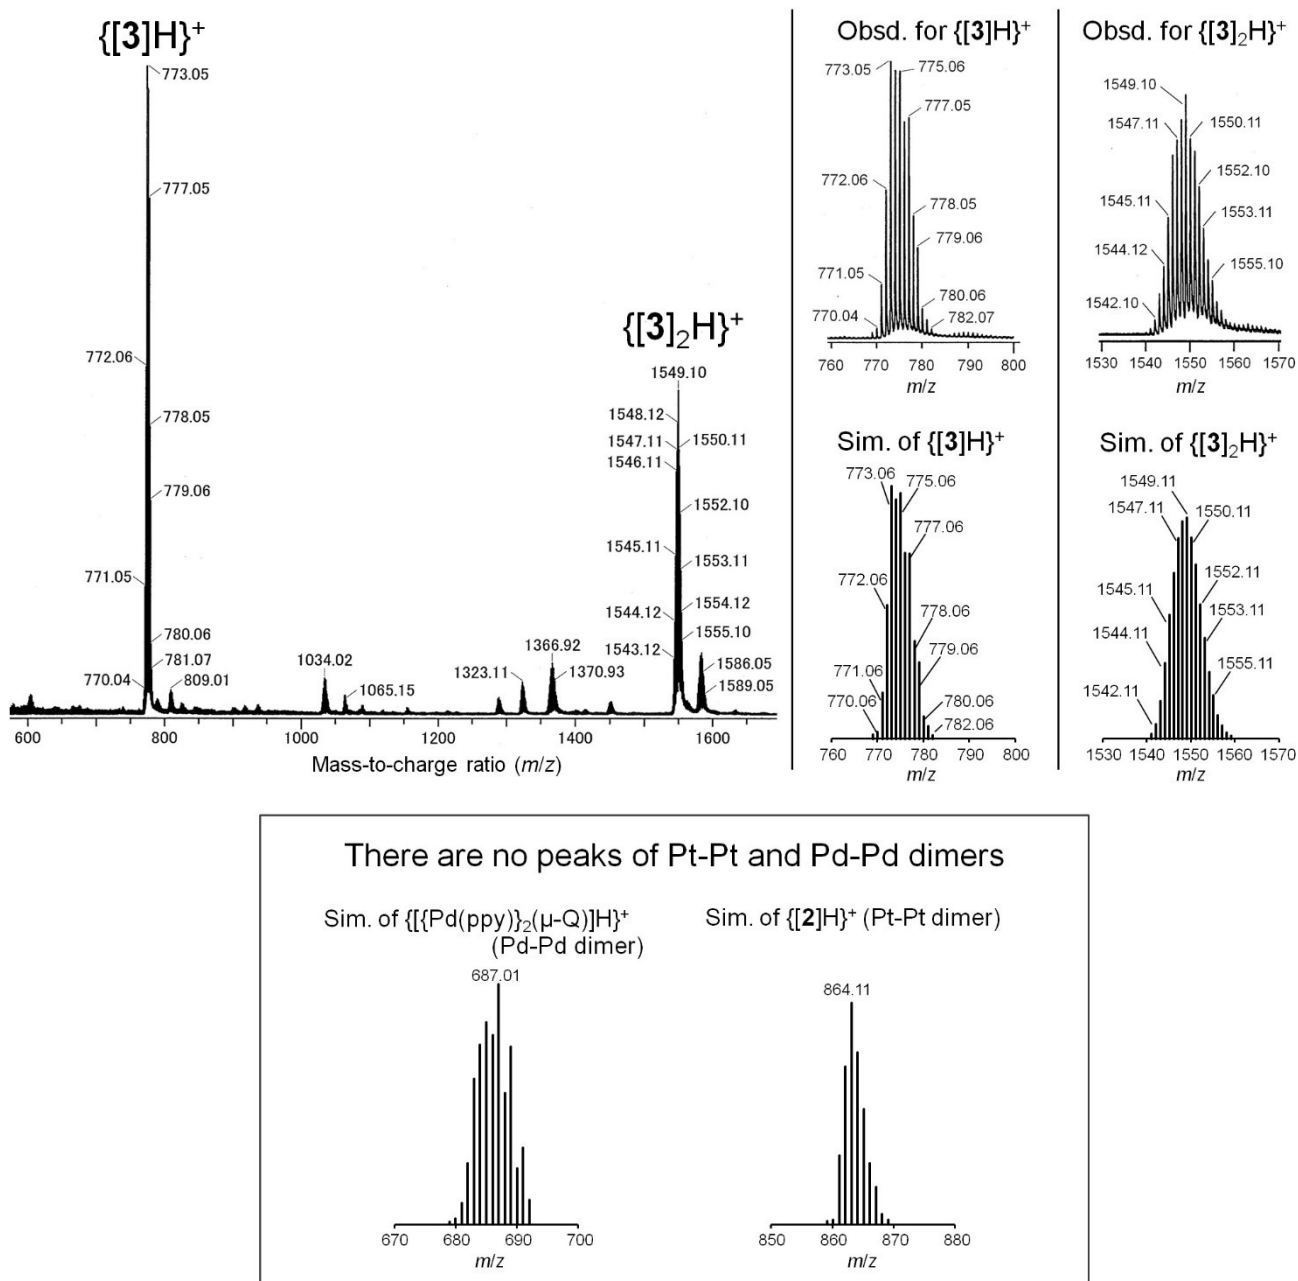

**Fig. S5.** ESI-TOF mass spectrum of **3** in  $CHCl_3$  together with the simulation patterns of the molecular ions  $[3 + H]^+$  and  $\{[3]_2 + H\}^+$ . Note that there are no peaks of Pt-Pt and Pd-Pd dimers in the spectrum.

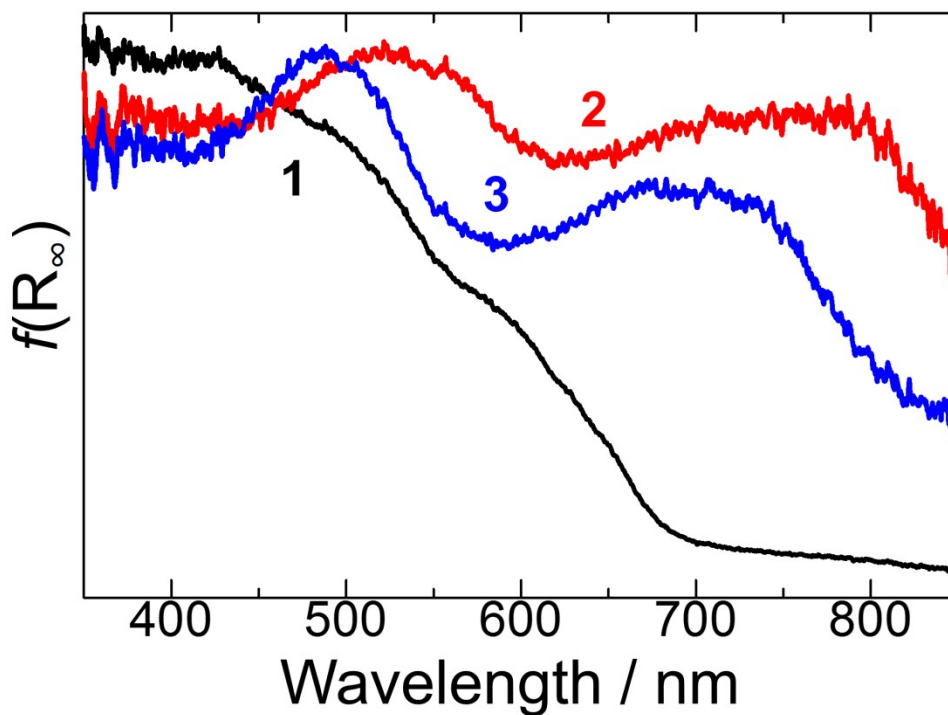

**Fig. S6.** UV-vis diffuse reflectance spectra for compounds **1** (black line), **2** (red line), and **3** (blue line) at room temperature. Observed absorption bands were almost similar to those of UV-vis absorption spectra in  $\text{CH}_2\text{Cl}_2$  (Fig. 5), indicating that all three compound have only the weak or negligible intermolecular interactions in solid states, as suggested by X-ray crystallographic analyses (Fig. 1-3).

(a)

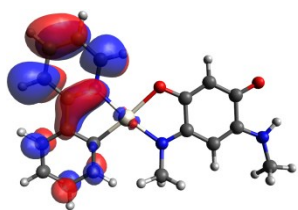

96 (LUMO+2) -1.3486 eV

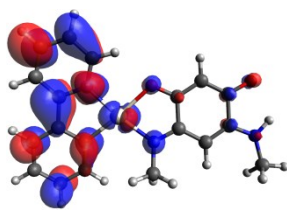

95 (LUMO+1) -1.8487 eV

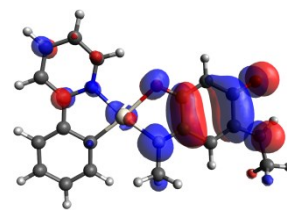

94 (LUMO) -2.7371 eV

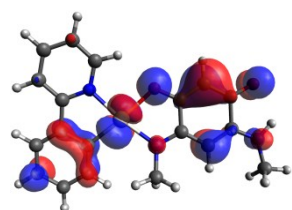

93 (HOMO) -5.4149 eV

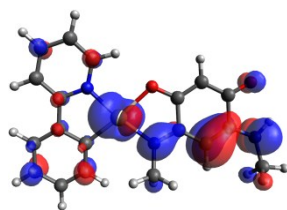

92 (HOMO-1) -5.7967 eV

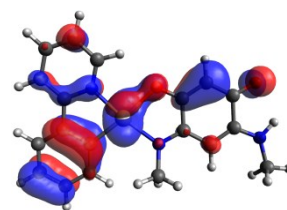

91 (HOMO-2) -6.1090 eV

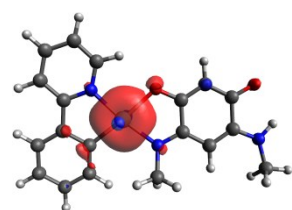

90 (HOMO-3) -6.23590 eV

(continued)



(b)

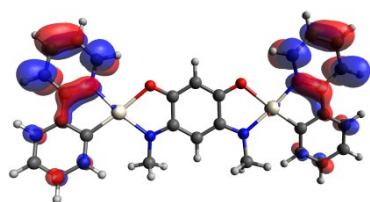

147 (LUMO+4) -1.2829 eV

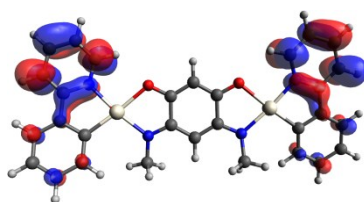

146 (LUMO+3) -1.2878 eV

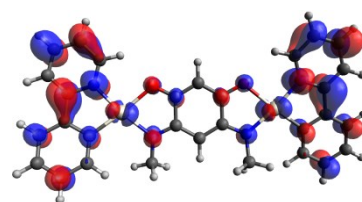

145 (LUMO+2) -1.7404 eV

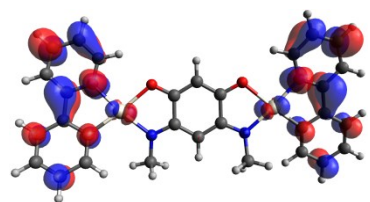

144 (LUMO+1) -1.8227 eV

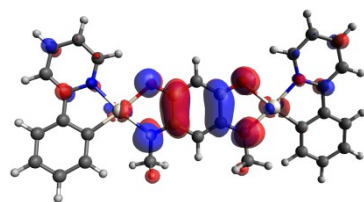

143 (LUMO) -2.7378 eV

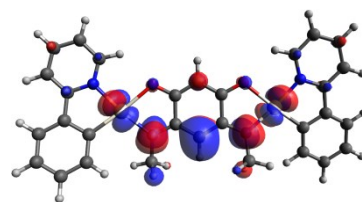

142 (HOMO) -5.0029 eV

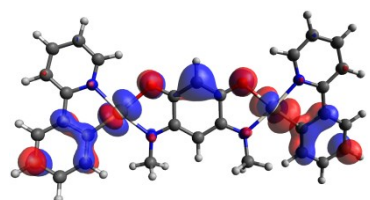

141 (HOMO-1) -5.4213 eV

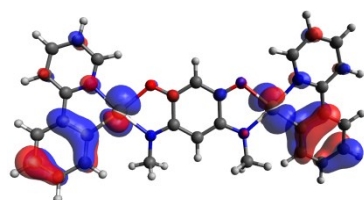

140 (HOMO-2) -5.7529 eV

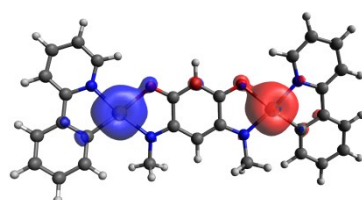

139 (HOMO-3) -6.0957 eV

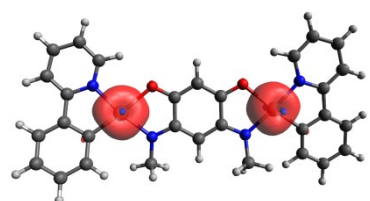

138 (HOMO-4) -6.1089 eV

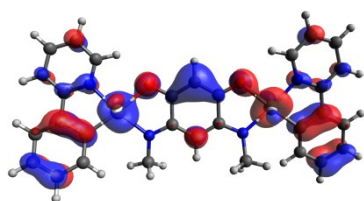

137 (HOMO-5) -6.2446 eV

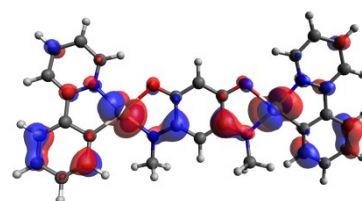

136 (HOMO-6) -6.3549 eV

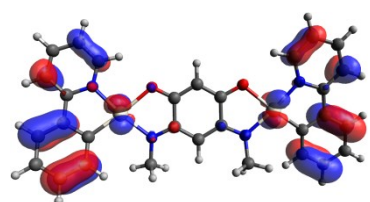

135 (HOMO-7) -6.5669 eV

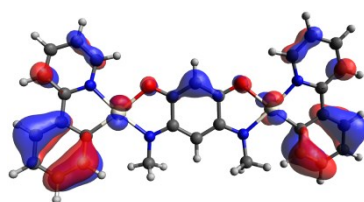

134 (HOMO-8) -6.6133 eV

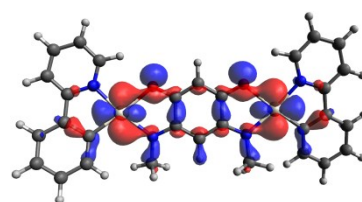

133 (HOMO-9) -7.0178 eV

(continued)

(c)

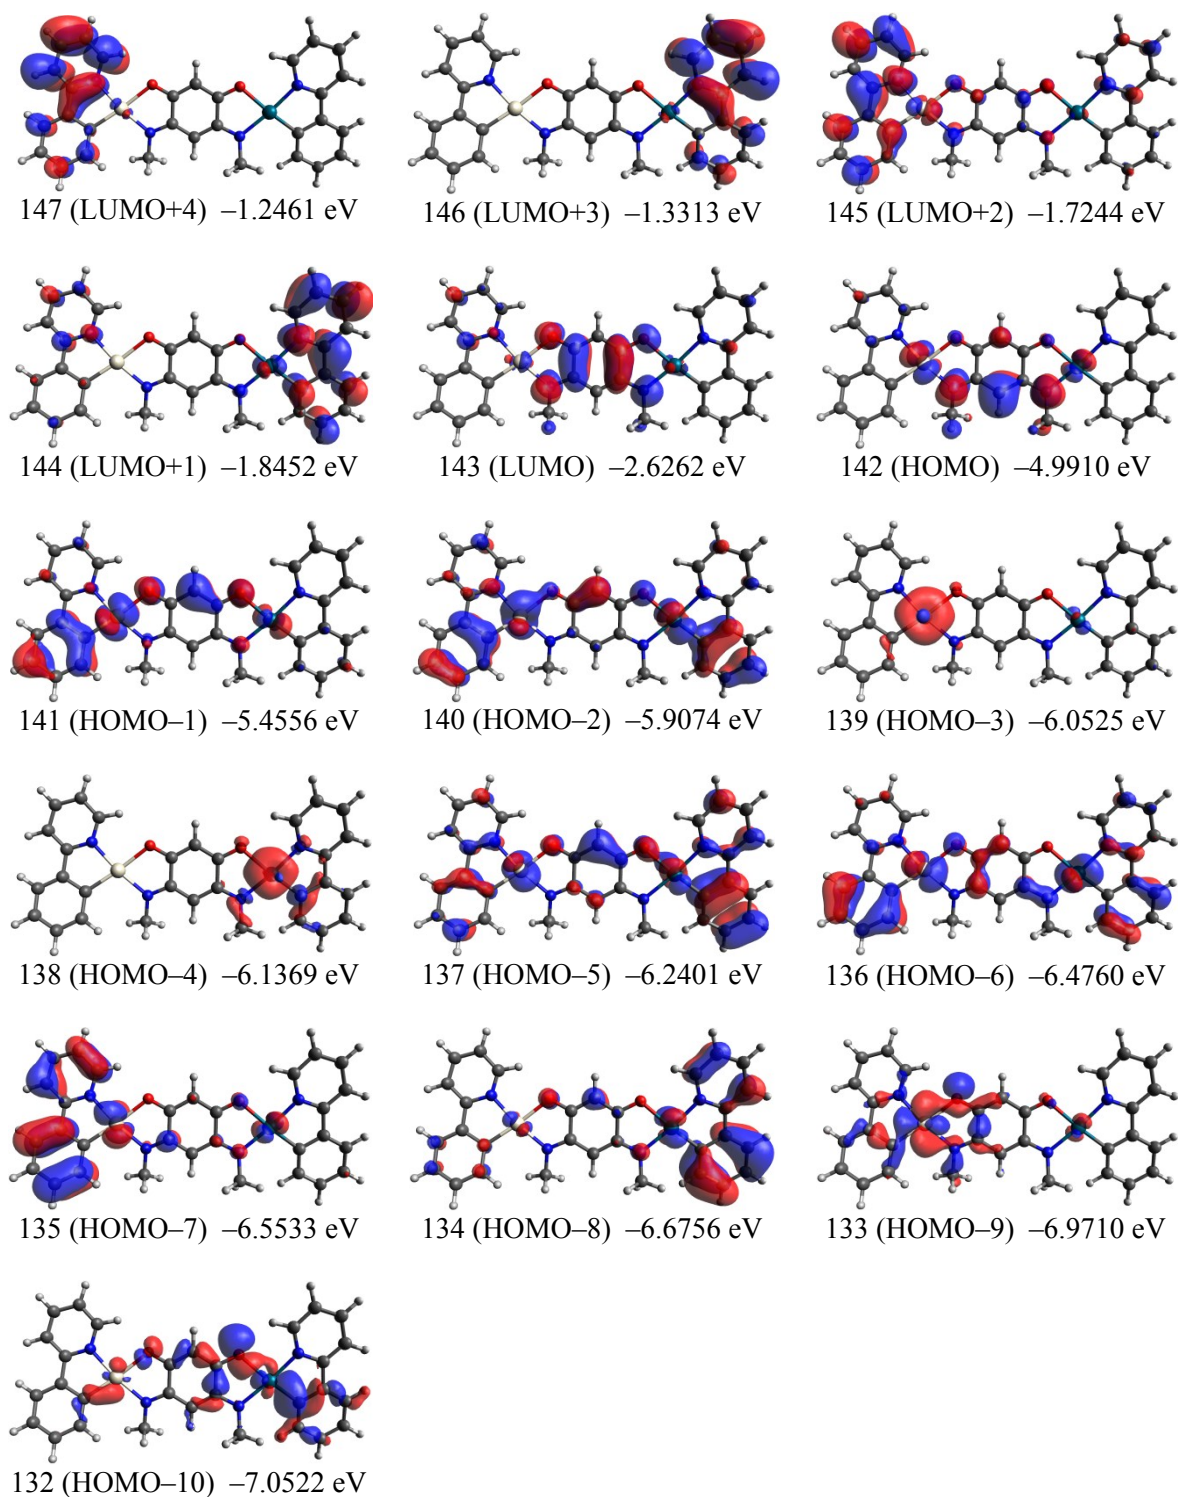

**Fig. S7.** Relevant calculated frontier orbitals for the electronic transitions observed in (a) **1**, (b) **2** and (c) **3**

(a)

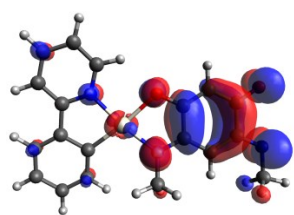

96 (LUMO+2) 1.4136 eV

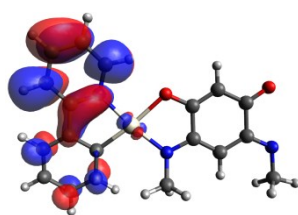

95 (LUMO+1) 1.0990 eV

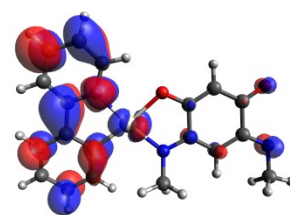

94 (LUMO) 0.5617 eV

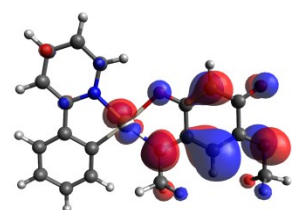

93 (HOMO) -1.5651 eV

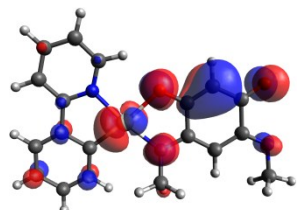

92 (HOMO-1) -2.2084 eV

(b)

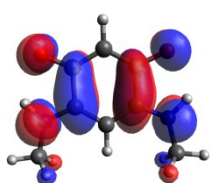

45 (LUMO) -2.9029 eV

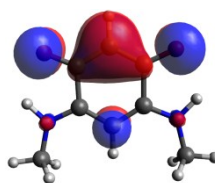

44 (HOMO) -5.4412 eV

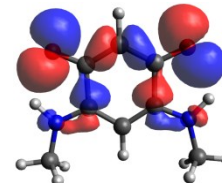

43 (HOMO-1) -6.5665 eV

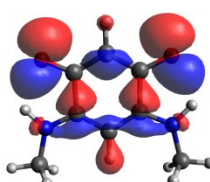

42 (HOMO-2) -6.8871 eV

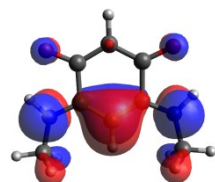

41 (HOMO-3) -6.9308 eV

**Fig. S8.** Frontier orbitals of (a)  $[1-H]^-$  (= deprotonated form of **1**, which was used as a synthetic intermediate of **2** and **3**) and (b)  $QH_2$ .

**Table S1.** Bond distances within the [O,N,N,O] donor quinonoid moieties of complexes **1**, **2** and **3**:

| Bond distances (Å) | <b>1</b> | <b>2</b> | <b>3</b> |
|--------------------|----------|----------|----------|
| C(12)-C(13)        | 1.53(1)  | 1.51(1)  | 1.49(1)  |
| C(15)-C(16)        | 1.55(1)  | 1.52(1)  | 1.52(1)  |
| C(13)-C(14)        | 1.43(1)  | 1.38(1)  | 1.41(1)  |
| C(14)-C(15)        | 1.34(1)  | 1.39(1)  | 1.36(1)  |
| C(12)-C(17)        | 1.35(1)  | 1.40(1)  | 1.39(1)  |
| C(16)-C(17)        | 1.38(1)  | 1.39(1)  | 1.39(1)  |

**Table S2.** Electronic Spectra of the complexes in CH<sub>2</sub>Cl<sub>2</sub>.

| Complex  | $\lambda_{\max}$ / nm ( $\epsilon$ / M <sup>-1</sup> cm <sup>-1</sup> ) |
|----------|-------------------------------------------------------------------------|
| <b>1</b> | 551 (258.55), 444 (24089), 348 (16451)                                  |
| <b>2</b> | 740 (4774), 686 (4374), 512 (20137), 376 (7347)                         |
| <b>3</b> | 701 (6209), 656 (6080), 478 (30668), 366 (13340)                        |

**Table S3.** The electronic transitions of **1** calculated by the TD-DFT method, based on the optimized structure (The corresponding molecular orbitals are shown in Fig. S7).

| Excited State | E (eV) | $\lambda$ (nm) | $f^a$ (> 0.01) <sup>b</sup> | Major contributions              | CI coef  (> 0.3)   |
|---------------|--------|----------------|-----------------------------|----------------------------------|--------------------|
| 1             | 2.0552 | 603.28         | 0.0079                      | HOMO → LUMO                      | 0.64782            |
| 2             | 2.6799 | 462.65         | 0.0351                      | HOMO-3 → LUMO<br>HOMO-2 → LUMO   | 0.45633<br>0.45553 |
| 3             | 2.6888 | 461.12         | 0.1031                      | HOMO-3 → LUMO<br>HOMO-1 → LUMO   | 0.49554<br>0.38173 |
| 5             | 2.9044 | 426.88         | 0.0596                      | HOMO → LUMO+1                    | 0.61592            |
| 6             | 2.9300 | 423.16         | 0.3646                      | HOMO-2 → LUMO<br>HOMO-1 → LUMO   | 0.34084<br>0.38739 |
| 11            | 3.5370 | 350.53         | 0.0514                      | HOMO-1 → LUMO+1<br>HOMO → LUMO+2 | 0.42204<br>0.45458 |

<sup>a</sup> Oscillator strength. <sup>b</sup> Except for the excited state 1.

**Table S4.** The electronic transitions of **2** calculated by the TD-DFT method, based on the optimized structure (The corresponding molecular orbitals are shown in Fig. S7).

| Excited State | E (eV) | $\lambda$ (nm) | $f^a$ (> 0.01) | Major contributions         | CI coef  (> 0.3) |
|---------------|--------|----------------|----------------|-----------------------------|------------------|
| 1             | 1.7796 | 696.68         | 0.0826         | HOMO $\rightarrow$ LUMO     | 0.57602          |
| 2             | 2.3211 | 534.16         | 0.7620         | HOMO-1 $\rightarrow$ LUMO   | 0.59004          |
| 7             | 2.7950 | 443.59         | 0.0316         | HOMO $\rightarrow$ LUMO+2   | 0.64667          |
| 8             | 2.9580 | 419.15         | 0.1963         | HOMO-5 $\rightarrow$ LUMO   | 0.62525          |
| 9             | 3.0327 | 408.83         | 0.0238         | HOMO-1 $\rightarrow$ LUMO+1 | 0.58379          |
| 11            | 3.1010 | 399.82         | 0.0203         | HOMO-2 $\rightarrow$ LUMO+1 | 0.31533          |
|               |        |                |                | HOMO-1 $\rightarrow$ LUMO+2 | 0.49864          |
| 12            | 3.2809 | 377.90         | 0.0249         | HOMO $\rightarrow$ LUMO+3   | 0.66064          |
| 13            | 3.2917 | 376.66         | 0.0133         | HOMO $\rightarrow$ LUMO+4   | 0.63706          |
| 14            | 3.3649 | 368.46         | 0.0181         | HOMO-9 $\rightarrow$ LUMO   | 0.33107          |
|               |        |                |                | HOMO-7 $\rightarrow$ LUMO   | 0.48406          |
| 17            | 3.4086 | 363.74         | 0.0159         | HOMO-8 $\rightarrow$ LUMO   | 0.55708          |

<sup>a</sup> Oscillator strength.

**Table S5.** The electronic transitions of **3** calculated by the TD-DFT method, based on the optimized structure (The corresponding molecular orbitals are shown in Fig. S7).

| Excited State | E (eV) | $\lambda$ (nm) | $f^a$ (> 0.01) | Major contributions         | CI coef  (> 0.3) |
|---------------|--------|----------------|----------------|-----------------------------|------------------|
| 1             | 1.8728 | 662.03         | 0.0820         | HOMO $\rightarrow$ LUMO     | 0.59004          |
| 2             | 2.4282 | 510.61         | 0.5123         | HOMO-1 $\rightarrow$ LUMO   | 0.58332          |
| 3             | 2.6520 | 467.51         | 0.0403         | HOMO-3 $\rightarrow$ LUMO   | 0.58126          |
| 4             | 2.6979 | 459.56         | 0.1563         | HOMO-3 $\rightarrow$ LUMO   | 0.35863          |
|               |        |                |                | HOMO-2 $\rightarrow$ LUMO   | 0.41426          |
| 6             | 2.7632 | 448.69         | 0.0709         | HOMO-4 $\rightarrow$ LUMO   | 0.57932          |
| 8             | 3.0629 | 404.79         | 0.0577         | HOMO-5 $\rightarrow$ LUMO   | 0.48472          |
|               |        |                |                | HOMO-1 $\rightarrow$ LUMO+2 | 0.38380          |
| 9             | 3.0988 | 400.10         | 0.0674         | HOMO-5 $\rightarrow$ LUMO   | 0.44002          |
|               |        |                |                | HOMO-1 $\rightarrow$ LUMO+1 | 0.32391          |
| 12            | 3.2919 | 376.64         | 0.0612         | HOMO $\rightarrow$ LUMO+4   | 0.57761          |
| 14            | 3.3333 | 371.96         | 0.0265         | HOMO-6 $\rightarrow$ LUMO   | 0.50978          |
|               |        |                |                | HOMO $\rightarrow$ LUMO+4   | 0.30332          |
| 17            | 3.4415 | 360.27         | 0.0144         | HOMO-9 $\rightarrow$ LUMO   | 0.40376          |
|               |        |                |                | HOMO-7 $\rightarrow$ LUMO   | 0.45490          |
| 18            | 3.4662 | 357.70         | 0.0148         | HOMO-10 $\rightarrow$ LUMO  | 0.48405          |

<sup>a</sup> Oscillator strength.
